# Supplementary material for: Increased biosynthesis of acetyl-CoA in the yeast Saccharomyces cerevisiae by overexpression of a deregulated pantothenate kinase gene and engineering of the coenzyme A biosynthetic pathway
Source: PubMed Central journal article supplement (PMC8494682; doi:10.1007/s00253-021-11523-4), 2021-09-07
Supplement: 253_2021_11523_MOESM1_ESM.pdf [file 253_2021_11523_MOESM1_ESM.pdf]

**Applied Microbiology and Biotechnology**

**Supplementary Material**

**Increased biosynthesis of acetyl-CoA  
in the yeast *Saccharomyces cerevisiae*  
by overexpression of a deregulated pantothenate kinase gene**

Judith Olzhausen<sup>1</sup>, Mathias Grigat, Larissa Seifert<sup>2</sup>,  
Tom Ulbricht and Hans-Joachim Schüller

Center for Functional Genomics of Microbes,  
Abteilung Molekulare Genetik und Infektionsbiologie,  
Universität Greifswald,  
Felix-Hausdorff-Strasse 8, D-17487 Greifswald, Germany

**For correspondence:**

Hans-Joachim Schüller, E-mail: [schuell@uni-greifswald.de](mailto:schuell@uni-greifswald.de); Tel. +49 3834 4205703;  
Fax +49 3834 4205709.

Present address:

<sup>1</sup> Cendres+Métaux SA, CH-2501 Biel/Bienne, Switzerland

<sup>2</sup> Universitätsklinikum Hamburg-Eppendorf, Medizinische Klinik, Nephrologie

**Supplementary Table S1: Complete list of *S. cerevisiae* strains.**

| Strain                            | Genotype                                                                                                                                                                                                                                                                                                                                                                                                                                                                                                                                                  |
|-----------------------------------|-----------------------------------------------------------------------------------------------------------------------------------------------------------------------------------------------------------------------------------------------------------------------------------------------------------------------------------------------------------------------------------------------------------------------------------------------------------------------------------------------------------------------------------------------------------|
| JS91.15-23                        | <i>MAT<math>\alpha</math> ura3 leu2 trp1 his3</i>                                                                                                                                                                                                                                                                                                                                                                                                                                                                                                         |
| JS91.14-24                        | <i>MAT<math>\alpha</math> ura3 his3 cab1<sup>ts, G351S</sup></i>                                                                                                                                                                                                                                                                                                                                                                                                                                                                                          |
| JS19.1                            | <i>MAT<math>\alpha</math> ura3 leu2 trp1 his3 cab1<math>\Delta</math>::HIS3 [pJO57: ARSH4 CEN6 URA3 CAB1]</i>                                                                                                                                                                                                                                                                                                                                                                                                                                             |
| LSY20                             | <i>MAT<math>\alpha</math> ura3 leu2 trp1 his3 cab4<math>\Delta</math>::HIS3 [pGE7: ARSH4 CEN6 URA3 CAB4]</i>                                                                                                                                                                                                                                                                                                                                                                                                                                              |
| LSY21                             | <i>MAT<math>\alpha</math> ura3 leu2 trp1 his3 cab5<math>\Delta</math>::HIS3 [pGE9: ARSH4 CEN6 URA3 CAB5]</i>                                                                                                                                                                                                                                                                                                                                                                                                                                              |
| BY4741                            | <i>MAT<math>\alpha</math> ura3 leu2 his3 met15</i>                                                                                                                                                                                                                                                                                                                                                                                                                                                                                                        |
| MGY5<br>(derived from JS91.15-23) | <i>MAT<math>\alpha</math> ura3 leu2 trp1 his3 + pSH62 (2<math>\mu</math>m HIS3 GAL1-cre)<br/>HIP1::TPI1<sub>PRO</sub>-HA<sub>3</sub>-CAB2-CYC1<sub>TER</sub></i>                                                                                                                                                                                                                                                                                                                                                                                          |
| MGY12<br>(derived from MGY5)      | <i>MAT<math>\alpha</math> ura3 leu2 trp1 his3 + pSH62 (2<math>\mu</math>m HIS3 GAL1-cre)<br/>HIP1::TPI1<sub>PRO</sub>-HA<sub>3</sub>-CAB2-CYC1<sub>TER</sub><br/>ENO1::TPI1<sub>PRO</sub>-HA<sub>3</sub>-CAB3-CYC1<sub>TER</sub></i>                                                                                                                                                                                                                                                                                                                      |
| MGY14<br>(derived from MGY12)     | <i>MAT<math>\alpha</math> ura3 leu2 trp1 his3 + pSH62 (2<math>\mu</math>m HIS3 GAL1-cre)<br/>HIP1::TPI1<sub>PRO</sub>-HA<sub>3</sub>-CAB2-CYC1<sub>TER</sub><br/>ENO1::TPI1<sub>PRO</sub>-HA<sub>3</sub>-CAB3-CYC1<sub>TER</sub><br/>MRH1::TPI1<sub>PRO</sub>-HA<sub>3</sub>-CAB4-CYC1<sub>TER</sub></i>                                                                                                                                                                                                                                                  |
| MGY16<br>(derived from MGY14)     | <i>MAT<math>\alpha</math> ura3 leu2 trp1 his3 + pSH62 (2<math>\mu</math>m HIS3 GAL1-cre)<br/>HIP1::TPI1<sub>PRO</sub>-HA<sub>3</sub>-CAB2-CYC1<sub>TER</sub><br/>ENO1::TPI1<sub>PRO</sub>-HA<sub>3</sub>-CAB3-CYC1<sub>TER</sub><br/>MRH1::TPI1<sub>PRO</sub>-HA<sub>3</sub>-CAB4-CYC1<sub>TER</sub><br/>ADH3::TPI1<sub>PRO</sub>-HA<sub>3</sub>-CAB5-CYC1<sub>TER</sub></i>                                                                                                                                                                              |
| MGY18<br>(derived from MGY16)     | <i>MAT<math>\alpha</math> ura3 leu2 trp1 his3 + pSH62 (2<math>\mu</math>m HIS3 GAL1-cre)<br/>HIP1::TPI1<sub>PRO</sub>-HA<sub>3</sub>-CAB2-CYC1<sub>TER</sub><br/>ENO1::TPI1<sub>PRO</sub>-HA<sub>3</sub>-CAB3-CYC1<sub>TER</sub><br/>MRH1::TPI1<sub>PRO</sub>-HA<sub>3</sub>-CAB4-CYC1<sub>TER</sub><br/>ADH3::TPI1<sub>PRO</sub>-HA<sub>3</sub>-CAB5-CYC1<sub>TER</sub><br/>ZPS1::TPI1<sub>PRO</sub>-HA<sub>3</sub>-CAB1<sub>W331R</sub>-CYC1<sub>TER</sub></i>                                                                                          |
| MGY20<br>(derived from MGY16)     | <i>MAT<math>\alpha</math> ura3 leu2 trp1 his3 + pSH62 (2<math>\mu</math>m HIS3 GAL1-cre)<br/>HIP1::TPI1<sub>PRO</sub>-HA<sub>3</sub>-CAB2-CYC1<sub>TER</sub><br/>ENO1::TPI1<sub>PRO</sub>-HA<sub>3</sub>-CAB3-CYC1<sub>TER</sub><br/>MRH1::TPI1<sub>PRO</sub>-HA<sub>3</sub>-CAB4-CYC1<sub>TER</sub><br/>ADH3::TPI1<sub>PRO</sub>-HA<sub>3</sub>-CAB5-CYC1<sub>TER</sub><br/>ZPS1::TPI1<sub>PRO</sub>-HA<sub>3</sub>-CAB1-CYC1<sub>TER</sub></i>                                                                                                          |
| MGY22<br>(derived from MGY18)     | <i>MAT<math>\alpha</math> ura3 leu2 trp1 his3 + pSH62 (2<math>\mu</math>m HIS3 GAL1-cre)<br/>HIP1::TPI1<sub>PRO</sub>-HA<sub>3</sub>-CAB2-CYC1<sub>TER</sub><br/>ENO1::TPI1<sub>PRO</sub>-HA<sub>3</sub>-CAB3-CYC1<sub>TER</sub><br/>MRH1::TPI1<sub>PRO</sub>-HA<sub>3</sub>-CAB4-CYC1<sub>TER</sub><br/>ADH3::TPI1<sub>PRO</sub>-HA<sub>3</sub>-CAB5-CYC1<sub>TER</sub><br/>ZPS1::TPI1<sub>PRO</sub>-HA<sub>3</sub>-CAB1<sub>W331R</sub>-CYC1<sub>TER</sub><br/>CUP9::TPI1<sub>PRO</sub>-HA<sub>3</sub>-HAL3<sub>aa 260-495</sub>-CYC1<sub>TER</sub></i> |
| MGY24<br>(derived from MGY20)     | <i>MAT<math>\alpha</math> ura3 leu2 trp1 his3 + pSH62 (2<math>\mu</math>m HIS3 GAL1-cre)<br/>HIP1::TPI1<sub>PRO</sub>-HA<sub>3</sub>-CAB2-CYC1<sub>TER</sub><br/>ENO1::TPI1<sub>PRO</sub>-HA<sub>3</sub>-CAB3-CYC1<sub>TER</sub><br/>MRH1::TPI1<sub>PRO</sub>-HA<sub>3</sub>-CAB4-CYC1<sub>TER</sub><br/>ADH3::TPI1<sub>PRO</sub>-HA<sub>3</sub>-CAB5-CYC1<sub>TER</sub><br/>ZPS1::TPI1<sub>PRO</sub>-HA<sub>3</sub>-CAB1-CYC1<sub>TER</sub><br/>CUP9::TPI1<sub>PRO</sub>-HA<sub>3</sub>-HAL3<sub>aa 260-495</sub>-CYC1<sub>TER</sub></i>                 |
| MGY6<br>(derived from BY4741)     | <i>MAT<math>\alpha</math> ura3 leu2 his3 met15 + pSH62 (2<math>\mu</math>m HIS3 GAL1-cre)<br/>HIP1::TPI1<sub>PRO</sub>-HA<sub>3</sub>-CAB2-CYC1<sub>TER</sub></i>                                                                                                                                                                                                                                                                                                                                                                                         |

|                                   |                                                                                                                                                                                                                                                                                                                                                                                                                                                                                                                                                                                                                                        |
|-----------------------------------|----------------------------------------------------------------------------------------------------------------------------------------------------------------------------------------------------------------------------------------------------------------------------------------------------------------------------------------------------------------------------------------------------------------------------------------------------------------------------------------------------------------------------------------------------------------------------------------------------------------------------------------|
| MGY13<br>(derived from MGY6)      | <i>MATa ura3 leu2 his3 met15 + pSH62 (2μm HIS3 GAL1-cre)</i><br><i>HIP1::TPI1<sub>PRO</sub>-HA<sub>3</sub>-CAB2-CYC1<sub>TER</sub></i><br><i>ENO1::TPI1<sub>PRO</sub>-HA<sub>3</sub>-CAB3-CYC1<sub>TER</sub></i>                                                                                                                                                                                                                                                                                                                                                                                                                       |
| MGY15<br>(derived from MGY13)     | <i>MATa ura3 leu2 his3 met15 + pSH62 (2μm HIS3 GAL1-cre)</i><br><i>HIP1::TPI1<sub>PRO</sub>-HA<sub>3</sub>-CAB2-CYC1<sub>TER</sub></i><br><i>ENO1::TPI1<sub>PRO</sub>-HA<sub>3</sub>-CAB3-CYC1<sub>TER</sub></i><br><i>MRH1::TPI1<sub>PRO</sub>-HA<sub>3</sub>-CAB4-CYC1<sub>TER</sub></i>                                                                                                                                                                                                                                                                                                                                             |
| MGY17<br>(derived from MGY15)     | <i>MATa ura3 leu2 his3 met15 + pSH62 (2μm HIS3 GAL1-cre)</i><br><i>HIP1::TPI1<sub>PRO</sub>-HA<sub>3</sub>-CAB2-CYC1<sub>TER</sub></i><br><i>ENO1::TPI1<sub>PRO</sub>-HA<sub>3</sub>-CAB3-CYC1<sub>TER</sub></i><br><i>MRH1::TPI1<sub>PRO</sub>-HA<sub>3</sub>-CAB4-CYC1<sub>TER</sub></i><br><i>ADH3::TPI1<sub>PRO</sub>-HA<sub>3</sub>-CAB5-CYC1<sub>TER</sub></i>                                                                                                                                                                                                                                                                   |
| MGY19<br>(derived from MGY17)     | <i>MATa ura3 leu2 his3 met15 + pSH62 (2μm HIS3 GAL1-cre)</i><br><i>HIP1::TPI1<sub>PRO</sub>-HA<sub>3</sub>-CAB2-CYC1<sub>TER</sub></i><br><i>ENO1::TPI1<sub>PRO</sub>-HA<sub>3</sub>-CAB3-CYC1<sub>TER</sub></i><br><i>MRH1::TPI1<sub>PRO</sub>-HA<sub>3</sub>-CAB4-CYC1<sub>TER</sub></i><br><i>ADH3::TPI1<sub>PRO</sub>-HA<sub>3</sub>-CAB5-CYC1<sub>TER</sub></i><br><i>ZPS1::TPI1<sub>PRO</sub>-HA<sub>3</sub>-CAB1<sub>W331R</sub>-CYC1<sub>TER</sub></i>                                                                                                                                                                         |
| MGY21<br>(derived from MGY17)     | <i>MATa ura3 leu2 his3 met15 + pSH62 (2μm HIS3 GAL1-cre)</i><br><i>HIP1::TPI1<sub>PRO</sub>-HA<sub>3</sub>-CAB2-CYC1<sub>TER</sub></i><br><i>ENO1::TPI1<sub>PRO</sub>-HA<sub>3</sub>-CAB3-CYC1<sub>TER</sub></i><br><i>MRH1::TPI1<sub>PRO</sub>-HA<sub>3</sub>-CAB4-CYC1<sub>TER</sub></i><br><i>ADH3::TPI1<sub>PRO</sub>-HA<sub>3</sub>-CAB5-CYC1<sub>TER</sub></i><br><i>ZPS1::TPI1<sub>PRO</sub>-HA<sub>3</sub>-CAB1-CYC1<sub>TER</sub></i>                                                                                                                                                                                         |
| MGY23<br>(derived from MGY19)     | <i>MATa ura3 leu2 his3 met15 + pSH62 (2μm HIS3 GAL1-cre)</i><br><i>HIP1::TPI1<sub>PRO</sub>-HA<sub>3</sub>-CAB2-CYC1<sub>TER</sub></i><br><i>ENO1::TPI1<sub>PRO</sub>-HA<sub>3</sub>-CAB3-CYC1<sub>TER</sub></i><br><i>MRH1::TPI1<sub>PRO</sub>-HA<sub>3</sub>-CAB4-CYC1<sub>TER</sub></i><br><i>ADH3::TPI1<sub>PRO</sub>-HA<sub>3</sub>-CAB5-CYC1<sub>TER</sub></i><br><i>ZPS1::TPI1<sub>PRO</sub>-HA<sub>3</sub>-CAB1<sub>W331R</sub>-CYC1<sub>TER</sub></i><br><i>CUP9::TPI1<sub>PRO</sub>-HA<sub>3</sub>-HAL3<sub>aa 260-495</sub>-CYC1<sub>TER</sub></i>                                                                          |
| MGY25<br>(derived from MGY21)     | <i>MATa ura3 leu2 his3 met15 + pSH62 (2μm HIS3 GAL1-cre)</i><br><i>HIP1::TPI1<sub>PRO</sub>-HA<sub>3</sub>-CAB2-CYC1<sub>TER</sub></i><br><i>ENO1::TPI1<sub>PRO</sub>-HA<sub>3</sub>-CAB3-CYC1<sub>TER</sub></i><br><i>MRH1::TPI1<sub>PRO</sub>-HA<sub>3</sub>-CAB4-CYC1<sub>TER</sub></i><br><i>ADH3::TPI1<sub>PRO</sub>-HA<sub>3</sub>-CAB5-CYC1<sub>TER</sub></i><br><i>ZPS1::TPI1<sub>PRO</sub>-HA<sub>3</sub>-CAB1-CYC1<sub>TER</sub></i><br><i>CUP9::TPI1<sub>PRO</sub>-HA<sub>3</sub>-HAL3<sub>aa 260-495</sub>-CYC1<sub>TER</sub></i>                                                                                          |
| TUY1<br>(derived from JS91.15-23) | <i>MATα ura3 leu2 trp1 his3 + pSH62 (2μm HIS3 GAL1-cre)</i><br><i>ZPS1::TPI1<sub>PRO</sub>-HA<sub>3</sub>-CAB1<sub>W331R</sub>-CYC1<sub>TER</sub></i>                                                                                                                                                                                                                                                                                                                                                                                                                                                                                  |
| TUY4<br>(derived from MGY22)      | <i>MATα ura3 leu2 trp1 his3 + pSH62 (2μm HIS3 GAL1-cre)</i><br><i>HIP1::TPI1<sub>PRO</sub>-HA<sub>3</sub>-CAB2-CYC1<sub>TER</sub></i><br><i>ENO1::TPI1<sub>PRO</sub>-HA<sub>3</sub>-CAB3-CYC1<sub>TER</sub></i><br><i>MRH1::TPI1<sub>PRO</sub>-HA<sub>3</sub>-CAB4-CYC1<sub>TER</sub></i><br><i>ADH3::TPI1<sub>PRO</sub>-HA<sub>3</sub>-CAB5-CYC1<sub>TER</sub></i><br><i>ZPS1::TPI1<sub>PRO</sub>-HA<sub>3</sub>-CAB1<sub>W331R</sub>-CYC1<sub>TER</sub></i><br><i>CUP9::TPI1<sub>PRO</sub>-HA<sub>3</sub>-HAL3<sub>aa 260-495</sub>-CYC1<sub>TER</sub></i><br><i>GAT1::TPI1<sub>PRO</sub>-HA<sub>3</sub>-FEN2-CYC1<sub>TER</sub></i> |
| LRY1<br>(derived from MGY22)      | <i>MATα ura3 leu2 trp1 his3 + pSH62 (2μm HIS3 GAL1-cre)</i><br><i>HIP1::TPI1<sub>PRO</sub>-HA<sub>3</sub>-CAB2-CYC1<sub>TER</sub></i><br><i>ENO1::TPI1<sub>PRO</sub>-HA<sub>3</sub>-CAB3-CYC1<sub>TER</sub></i><br><i>MRH1::TPI1<sub>PRO</sub>-HA<sub>3</sub>-CAB4-CYC1<sub>TER</sub></i><br><i>ADH3::TPI1<sub>PRO</sub>-HA<sub>3</sub>-CAB5-CYC1<sub>TER</sub></i><br><i>ZPS1::TPI1<sub>PRO</sub>-HA<sub>3</sub>-CAB1<sub>W331R</sub>-CYC1<sub>TER</sub></i><br><i>CUP9::TPI1<sub>PRO</sub>-HA<sub>3</sub>-HAL3<sub>aa 260-495</sub>-CYC1<sub>TER</sub></i>                                                                           |

|                             |                                                                                                                                                                                                                                                                                                                                                                                                                                                                                                                                                                                                                                                              |
|-----------------------------|--------------------------------------------------------------------------------------------------------------------------------------------------------------------------------------------------------------------------------------------------------------------------------------------------------------------------------------------------------------------------------------------------------------------------------------------------------------------------------------------------------------------------------------------------------------------------------------------------------------------------------------------------------------|
|                             | <i>pcd1Δ::LEU2</i>                                                                                                                                                                                                                                                                                                                                                                                                                                                                                                                                                                                                                                           |
| LRY2<br>(derived from TUY4) | <i>MATα ura3 leu2 trp1 his3 + pSH62 (2μm HIS3 GAL1-cre)</i><br><i>HIP1::TPI1<sub>PRO</sub>-HA<sub>3</sub>-CAB2-CYC1<sub>TER</sub></i><br><i>ENO1::TPI1<sub>PRO</sub>-HA<sub>3</sub>-CAB3-CYC1<sub>TER</sub></i><br><i>MRH1::TPI1<sub>PRO</sub>-HA<sub>3</sub>-CAB4-CYC1<sub>TER</sub></i><br><i>ADH3::TPI1<sub>PRO</sub>-HA<sub>3</sub>-CAB5-CYC1<sub>TER</sub></i><br><i>ZPS1::TPI1<sub>PRO</sub>-HA<sub>3</sub>-CAB1<sub>W331R</sub>-CYC1<sub>TER</sub></i><br><i>CUP9::TPI1<sub>PRO</sub>-HA<sub>3</sub>-HAL3<sub>aa 260-495</sub>-CYC1<sub>TER</sub></i><br><i>GAT1::TPI1<sub>PRO</sub>-HA<sub>3</sub>-FEN2-CYC1<sub>TER</sub></i><br><i>pcd1Δ::LEU2</i> |

**Supplementary Table S2: Plasmids used and constructed in this work.**

| Plasmid      | Genetic markers                                                                           |
|--------------|-------------------------------------------------------------------------------------------|
| pRS415       | <i>ARSH4 CEN6 LEU2</i> (Sikorski and Hieter, 1989)                                        |
| pRS416       | <i>ARSH4 CEN6 URA3</i> (Sikorski and Hieter, 1989)                                        |
| p415-MET25   | <i>ARSH4 CEN6 LEU2 MET25<sub>PRO</sub></i> (Mumberg <i>et al.</i> , 1994)                 |
| p416-MET25   | <i>ARSH4 CEN6 URA3 MET25<sub>PRO</sub></i> (Mumberg <i>et al.</i> , 1994)                 |
| p426-MET25HA | 2μm <i>URA3 MET25<sub>PRO</sub>-HA<sub>3</sub></i> (Mumberg <i>et al.</i> , 1994)         |
| pSH62        | 2μm <i>HIS3 GAL1-cre</i> (Güldener <i>et al.</i> , 1996)                                  |
| pTM8         | <i>ARSH4 CEN6 URA3 MET25<sub>PRO</sub>-CAB1</i> (wild-type)                               |
| pLS12-S8     | <i>ARSH4 CEN6 URA3 MET25<sub>PRO</sub>-CAB1<sup>G351S W331L</sup></i>                     |
| pLS12-S9     | <i>ARSH4 CEN6 URA3 MET25<sub>PRO</sub>-CAB1<sup>G351S D114E</sup></i>                     |
| pLS12-S10    | <i>ARSH4 CEN6 URA3 MET25<sub>PRO</sub>-CAB1<sup>G351S F103V</sup></i>                     |
| pLS12-Y6     | <i>ARSH4 CEN6 URA3 MET25<sub>PRO</sub>-CAB1<sup>G351S A22G</sup></i>                      |
| pJO20        | <i>CAB1</i>                                                                               |
| pJO57        | <i>ARSH4 CEN6 URA3 CAB1</i>                                                               |
| pKH45        | <i>ARSH4 CEN6 LEU2 MET25<sub>PRO</sub>-CAB1</i>                                           |
| pKH46        | <i>ARSH4 CEN6 LEU2 MET25<sub>PRO</sub>-CAB1<sup>W331L</sup></i>                           |
| pKH48        | <i>ARSH4 CEN6 LEU2 MET25<sub>PRO</sub>-CAB1<sup>Y326A F330A</sup></i>                     |
| pKH49        | <i>ARSH4 CEN6 LEU2 MET25<sub>PRO</sub>-CAB1<sup>I234E</sup></i>                           |
| pKH50        | <i>ARSH4 CEN6 LEU2 MET25<sub>PRO</sub>-CAB1<sup>N155V</sup></i>                           |
| pKH51        | <i>ARSH4 CEN6 LEU2 MET25<sub>PRO</sub>-CAB1<sup>S158V</sup></i>                           |
| pKH52        | <i>ARSH4 CEN6 LEU2 MET25<sub>PRO</sub>-CAB1<sup>R173A</sup></i>                           |
| pKH53        | <i>ARSH4 CEN6 LEU2 MET25<sub>PRO</sub>-CAB1<sup>A233E</sup></i>                           |
| pKH54        | <i>ARSH4 CEN6 LEU2 MET25<sub>PRO</sub>-CAB1<sup>W331R</sup></i>                           |
| pSBS5        | 2μm <i>URA3 MET25<sub>PRO</sub>-HA<sub>3</sub>-CAB1</i> (Olzhausen <i>et al.</i> , 2009)  |
| pJO3         | 2μm <i>URA3 MET25<sub>PRO</sub>-HA<sub>3</sub>-CAB3</i>                                   |
| pJO73        | 2μm <i>URA3 MET25<sub>PRO</sub>-HA<sub>3</sub>-PANK3</i> (Olzhausen <i>et al.</i> , 2009) |
| pEB5         | 2μm <i>URA3 MET25<sub>PRO</sub>-HA<sub>3</sub>-CAB1<sup>Y326A F330A</sup></i>             |
| pEB6         | 2μm <i>URA3 MET25<sub>PRO</sub>-HA<sub>3</sub>-cab1<sup>I234E</sup></i>                   |
| pEB8         | 2μm <i>URA3 MET25<sub>PRO</sub>-HA<sub>3</sub>-CAB1<sup>W331L</sup></i>                   |
| pEB22        | 2μm <i>URA3 MET25<sub>PRO</sub>-HA<sub>3</sub>-CAB1<sup>N155V</sup></i>                   |
| pEB23        | 2μm <i>URA3 MET25<sub>PRO</sub>-HA<sub>3</sub>-cab1<sup>S158V</sup></i>                   |
| pEB25        | 2μm <i>URA3 MET25<sub>PRO</sub>-HA<sub>3</sub>-cab1<sup>R173A</sup></i>                   |
| pEB26        | 2μm <i>URA3 MET25<sub>PRO</sub>-HA<sub>3</sub>-CAB1<sup>A233E</sup></i>                   |
| pEB27        | 2μm <i>URA3 MET25<sub>PRO</sub>-HA<sub>3</sub>-CAB1<sup>W331R</sup></i>                   |
| pGE7         | <i>ARSH4 CEN6 URA3 CAB4</i>                                                               |
| pGE8         | <i>ARSH4 CEN6 LEU2 CAB4</i>                                                               |
| pGE9         | <i>ARSH4 CEN6 URA3 CAB5</i>                                                               |
| pGE10        | <i>ARSH4 CEN6 LEU2 CAB5</i>                                                               |
| pLS14        | 2μm <i>URA3 MET25<sub>PRO</sub>-HA<sub>3</sub>-hCOASY</i> (full-length)                   |

|                       |                                                                                                                    |
|-----------------------|--------------------------------------------------------------------------------------------------------------------|
| pLS15                 | 2 $\mu$ m <i>URA3 MET25<sub>PRO</sub>-HA<sub>3</sub>-hCOASY</i> (aa 30-564)                                        |
| pLS20                 | <i>ARSH4 CEN6 LEU2 MET25<sub>PRO</sub>-hCOASY</i> (full-length)                                                    |
| pSBS7                 | <i>cab1<math>\Delta</math>::HIS3</i> (Olzhausen <i>et al.</i> , 2009)                                              |
| pSB2                  | <i>cab4<math>\Delta</math>::HIS3</i> (Olzhausen <i>et al.</i> , 2009)                                              |
| pSB5                  | <i>cab5<math>\Delta</math>::HIS3</i> (Olzhausen <i>et al.</i> , 2009)                                              |
| pLR2                  | <i>pcd1<math>\Delta</math>::LEU2</i>                                                                               |
| pLEUTEX3              | <i>TPI1<sub>PRO</sub>-HA<sub>3</sub>-CYC1<sub>TER</sub>::loxP::LEU2::loxP</i>                                      |
| pLEUTEX-CAB1          | <i>ZPS1-5'-flank::TPI1<sub>PRO</sub>-HA<sub>3</sub>-CAB1-CYC1<sub>TER</sub>::ZPS1-3'-flank</i>                     |
| pLEUTEX-CAB1<br>W331R | <i>ZPS1-5'-flank::TPI1<sub>PRO</sub>-HA<sub>3</sub>-CAB1<sub>W331R</sub>-CYC1<sub>TER</sub>::ZPS1-3'-flank</i>     |
| pLEUTEX-CAB2          | <i>HIP1-5'-flank::TPI1<sub>PRO</sub>-HA<sub>3</sub>-CAB2-CYC1<sub>TER</sub>::HIP1-3'-flank</i>                     |
| pLEUTEX-CAB3          | <i>ENO1-5'-flank::TPI1<sub>PRO</sub>-HA<sub>3</sub>-CAB3-CYC1<sub>TER</sub>::ENO1-3'-flank</i>                     |
| pLEUTEX-CAB4          | <i>MRH1-5'-flank::TPI1<sub>PRO</sub>-HA<sub>3</sub>-CAB4-CYC1<sub>TER</sub>::MRH1-3'-flank</i>                     |
| pLEUTEX-CAB5          | <i>ADH3-5'-flank::TPI1<sub>PRO</sub>-HA<sub>3</sub>-CAB5-CYC1<sub>TER</sub>::ADH3-3'-flank</i>                     |
| pLEUTEX-HAL3          | <i>CUP9-5'-flank::TPI1<sub>PRO</sub>-HA<sub>3</sub>-HAL3<sub>aa260-495</sub>-CYC1<sub>TER</sub>::CUP9-3'-flank</i> |
| pLEUTEX-FEN2          | <i>GAT1-5'-flank::TPI1<sub>PRO</sub>-HA<sub>3</sub>-FEN2-CYC1<sub>TER</sub>::GAT1-3'-flank</i>                     |

aa, amino acids; PRO, promoter; TER, terminator.

### Supplementary Table S3: Oligonucleotides used in this work.

| Name                    | Gene        | Position    | Sequence (5'-3')                       |
|-------------------------|-------------|-------------|----------------------------------------|
| <b>ORF-Primer</b>       |             |             |                                        |
| CAB1-Bam-Start          | <i>CAB1</i> | +1/+19      | gactggatccATGCCGCGAATTACTCAAG          |
| CAB1-Hind-Stop          | <i>CAB1</i> | +1104/+1084 | gactaagcttCTACGTA CTTGTTTTCTTAGT       |
| YIL083C-BamHI           | <i>CAB2</i> | +1/+20      | gactggatccATGCCACCTCTACCCGTGCT         |
| YIL083C-XhoI            | <i>CAB2</i> | +1098/+1075 | gactctcgagTTATTTTCGTAGCTAGCTTAGTTTT    |
| YKL088W-Start           | <i>CAB3</i> | +1/+20      | gactggatccATGACGGATGAAAAAGTGAA         |
| YKL088W-Stop            | <i>CAB3</i> | +1716/+1693 | gactaagcTTAAACTTGCGTTTTTACGTCCTC       |
| CAB4-Bam-Start          | <i>CAB4</i> | +1/+20      | gactggatccATGGTTGAGGAAAATTCCAG         |
| CAB4-Hind-Stop          | <i>CAB4</i> | +918/+897   | gactaagcTTATACGCAAGGGTTTTGTGGA         |
| CAB5-Bam-Start          | <i>CAB5</i> | +1/+20      | gactggatccATGCTGGTAGTGGGATTGAC         |
| CAB5-Cla-Stop           | <i>CAB5</i> | +726/+705   | gactatcgatTTATACCGCTGAAGACTTTTTTA      |
| Hal3-BgIII Start260     | <i>HAL3</i> | +778/+798   | gatcagatctAAAATGGATGATGGAAAATTGCACGTG  |
| Hal3-HindIII Stop495    | <i>HAL3</i> | +1485/+1464 | gatcaagcttTAGTTATTTTTTTGGGTACCCACCC    |
| FEN2-BamHI Start        | <i>FEN2</i> | +1/+22      | gatcggatccATGATGAAGGAATCGAAATCTA       |
| FEN2-HindIII Stop       | <i>FEN2</i> | +1539/+1517 | gatcaagcttCTATCGGAAAGGATTTGAAATTT      |
| <b>Mutagenic primer</b> |             |             |                                        |
| CAB1-                   | <i>CAB1</i> | +445/+483   | TACCCATACCTTCTAGTC <b>GT</b> GATAGGGT- |

|                                                                                            |      |             |                                                                        |
|--------------------------------------------------------------------------------------------|------|-------------|------------------------------------------------------------------------|
| N155V-F                                                                                    |      |             | CGGGTGTCTCA                                                            |
| CAB1-N155V-R                                                                               | CAB1 | +483/+445   | TGAGACACCCGACCCTAT <b>CAC</b> ACTAGAGAGGTATGGGTA                       |
| CAB1-S158V-F                                                                               | CAB1 | +453/+489   | CCTTCTAGTCAATATAGGG <b>GTGG</b> GTGTC-TCAATATTA                        |
| CAB1-S158V-R                                                                               | CAB1 | +489/+453   | TAATATTGAGACACCC <b>CACC</b> CCTATATTGACTAGAAGG                        |
| CAB1-R173A-F                                                                               | CAB1 | +499/+537   | GAACCAAACAATTTTAGT <b>GCCG</b> TAGGCG-GTTCTTCACTG                      |
| CAB1-R173A-R                                                                               | CAB1 | +537/+499   | CAGTGAAGAACC GCCTAC <b>GGC</b> ACTAAAA-TTGTGGTTTC                      |
| CAB1-I234E-F                                                                               | CAB1 | +682/+717   | GGTCTAAAGTCGTCAGCT <b>GAGG</b> CAAGTT-CATTTGGT                         |
| CAB1-I234E-R                                                                               | CAB1 | +717/+682   | ACCAAATGAACTTGC <b>CTC</b> AGCTGACGAC-TTTAGACC                         |
| CAB1-A233E-F                                                                               | CAB1 | +682/+716   | GGTCTAAAGTCGTCAG <b>GAG</b> ATTGCAAGTT-CATTTGG                         |
| CAB1-A233E-R                                                                               | CAB1 | +716/682    | CCAAATGAACTTGAAT <b>CTCT</b> GACGAC-TTTAGACC                           |
| CAB1-W331R-F                                                                               | CAB1 | +972/1013   | GAGCTACGCTATTAATTTTT <b>CGG</b> TCACAA-GGATCAAAGCAAGC                  |
| CAB1-W331R-R                                                                               | CAB1 | +1013/972   | CGTTGCTTTGATCCTTGTGAC <b>CCG</b> AAAATT-AATAGCGTAGCTC                  |
| CAB1-W331L-F                                                                               | CAB1 | +972/+1013  | GAGCTACGCTATTAATTTTT <b>TG</b> TCACAA-GGATCAAAGCAAGC                   |
| CAB1-W331L-R                                                                               | CAB1 | +1013/+972  | CGTTGCTTTGATCCTTGTGAC <b>CA</b> AAAAATT-AATAGCGTAGCTC                  |
| CAB1-Y326A F330A-F                                                                         | CAB1 | +958/+1008  | ACCATGAACACTTTGAGC <b>GCGG</b> CTATTAAT- <b>GCG</b> TGGTCACAAGGATCAAAG |
| CAB1-Y326A F330A-R                                                                         | CAB1 | +1008/+958  | CTTTGATCCTTGTGACC <b>CGC</b> AATAATAGC- <b>CGC</b> GCTCAAAGTGTTTCATGGT |
| <b>Primers for amplification of flanking regions to be inserted into pLEUTEX cassettes</b> |      |             |                                                                        |
| ADH3 5F<br>Sacl                                                                            | ADH3 | -2100/-2081 | gatcgagctcCTGCATGTTTACAAGGCCAAA                                        |
| ADH3 5F<br>BglII                                                                           | ADH3 | -1631/-1650 | gatcagatctTGGTCAAGACCAGAATTACT                                         |
| ADH3 3F<br>NheI                                                                            | ADH3 | -1550/-1531 | gatcgctagcCAAGGAGTAGCTTCCTTCAA                                         |
| ADH3 3F<br>KpnI                                                                            | ADH3 | -1131/-1150 | gatcggtagcCATTGTGCAAAGACCCATGC                                         |
| ADH3 Veri                                                                                  | ADH3 | -2140/-2121 | CAGAAGCTTTCGTGAGATAC                                                   |
| CUP9 5F<br>Sacl                                                                            | CUP9 | -1570/-1551 | gatcgagctcGACGGCTTGTAAACGGGTGCC                                        |
| CUP9 5F<br>BglII                                                                           | CUP9 | -1141/-1160 | gatcagatctAGGGGCCCCGACAATATTGCT                                        |
| CUP9 3F<br>NheI                                                                            | CUP9 | -1030/-1011 | gatcgctagcGTAGTATGCCTCCGAAGCTC                                         |
| CUP9 3F<br>KpnI                                                                            | CUP9 | -601/-620   | atcggtagcGTGCTCAGAAAACCCCGTGG                                          |
| CUP9 Veri                                                                                  | CUP9 | -1620/-1601 | GATATTTGAATCAGCTGGAG                                                   |
| ENO1 5F<br>Sacl                                                                            | ENO1 | -1580/-1561 | gatcgagctcTACATTCATGTTTGCACGCT                                         |
| ENO1 5F<br>BglII                                                                           | ENO1 | -1231/-1250 | gatcagatctTCTGGATAAGTGCTGTGCAT                                         |
| ENO1 3F                                                                                    | ENO1 | -1106/-1086 | gatcgctagcAATGGCCCTATATTGAAAGC                                         |

|                                 |             |             |                                              |
|---------------------------------|-------------|-------------|----------------------------------------------|
| NheI                            |             |             |                                              |
| ENO1 3F<br>KpnI                 | <i>ENO1</i> | -771/-790   | gatcgggtaccGCTCAAGTGCCCGCGGCATC              |
| ENO1 Veri                       | <i>ENO1</i> | -1210/-1191 | TGACTCAAATTCTTCTCGAC                         |
| GAT1 5F<br>SacI                 | <i>GAT1</i> | +1881/+1900 | gatcgagctcAACCGAGACCTGAACATCCT               |
| GAT1 5F<br>BamHI                | <i>GAT1</i> | +2320/+2301 | gatcggatccAGCGGGAAACTCCTTAGTGT               |
| GAT1 3F<br>NheI                 | <i>GAT1</i> | +2451/+2460 | gatcgctagcGCCCCAAATGTCAGTGATGG               |
| GAT 3F KpnI                     | <i>GAT1</i> | +2870/+2851 | gatcgggtaccAGAAACGATATTAAGCCTGG              |
| GAT1 Veri                       | <i>GAT1</i> | +1811/+1830 | CTAAACCAGTTATCCTAGGC                         |
| HIP1 5F SacI                    | <i>HIP1</i> | -1573/-1554 | gactgagctcTTGTCTGCCGAAATTCTGTG               |
| HIP1 5F<br>BamHI                | <i>HIP1</i> | -1162/-1171 | gactggatccAGTAGCTTGTGAACGATAGG               |
| HIP1 3F NheI                    | <i>HIP1</i> | -960/-941   | gactgctagcTTTACCCCTCTCCACAGATC               |
| HIP1 3F KpnI                    | <i>HIP1</i> | -636/-655   | gactgggtaccCCAGGTTGAATACAAAACGG              |
| HIP1 5-Veri                     | <i>HIP1</i> | -1620/-1601 | ATTGAGCCACCGCTTCATCT                         |
| MRH1 5F<br>SacI                 | <i>MRH1</i> | -1860/-1841 | gatcgagctcTCTTGTTCCCATCTACGGGT               |
| MRH1 5F<br>BglII                | <i>MRH1</i> | -1471/-1490 | gatcagatctGGAAGCGTTGGAAAAGAAGG               |
| MRH1 3F<br>NheI                 | <i>MRH1</i> | -1230/-1211 | gatcgctagcCTCCTCGAGACAAGGTCGCT               |
| MRH1 3F<br>KpnI                 | <i>MRH1</i> | -851/-870   | gatcgggtaccGTTTGGGTCTCTTGGTAACC              |
| MRH1 Veri                       | <i>MRH1</i> | -1940/-1921 | ACTTGCGCGCCGACATTTG                          |
| ZPS1 5F<br>SacI                 | <i>ZPS1</i> | -2380/-2361 | atcgagctcAGGCGCGTGTCTACCTCGTA                |
| ZPS1 5F<br>BglII                | <i>ZPS1</i> | -1931/-1150 | gatcagatctGGCCTCGGCAACTTTCAGGG               |
| ZPS1 3F<br>NheI                 | <i>ZPS1</i> | -1560/-1541 | gatcgctagcGGTATGATCTACCCCATTCG               |
| ZPS1 3F<br>KpnI                 | <i>ZPS1</i> | -1241/-1250 | gatcgggtaccCCGCGAAGACTACGCAAATA              |
| ZPS1 Veri                       | <i>ZPS1</i> | -2430/-2411 | AGTTAGTGGTTGCCTTCCGT                         |
| <b>Construction of pLEUTEX3</b> |             |             |                                              |
| LEU2-LBN                        |             |             | gactggatccatgcatCAACCCTTAATATAACTTCGTAT<br>A |
| LEU2-RXN                        |             |             | gactctcgaggctagcACCTAATAACTTCGTATAGCAT       |
| MET25HAX                        |             |             | gacttctagaAAAATGTATCCTTATGATGTTCC            |
| CYC1TER<br>NSI                  |             |             | gactatgcatCGGCCGCAAATTAAGCCTT                |
| TPI1-Prom                       | <i>TPI1</i> | -600/-580   | gactgagctcagatctGAGACCTAACTACATAGTGT         |
| TPI1PR-XB                       | <i>TPI1</i> | -26/-5      | gacttctagaGTTTATGTATGTGTTTTTTGT              |

Authentic gene sequences are shown in capital letters; auxiliary sequences are depicted in lower case letters. Bold letters indicate the sequence of mutations introduced.

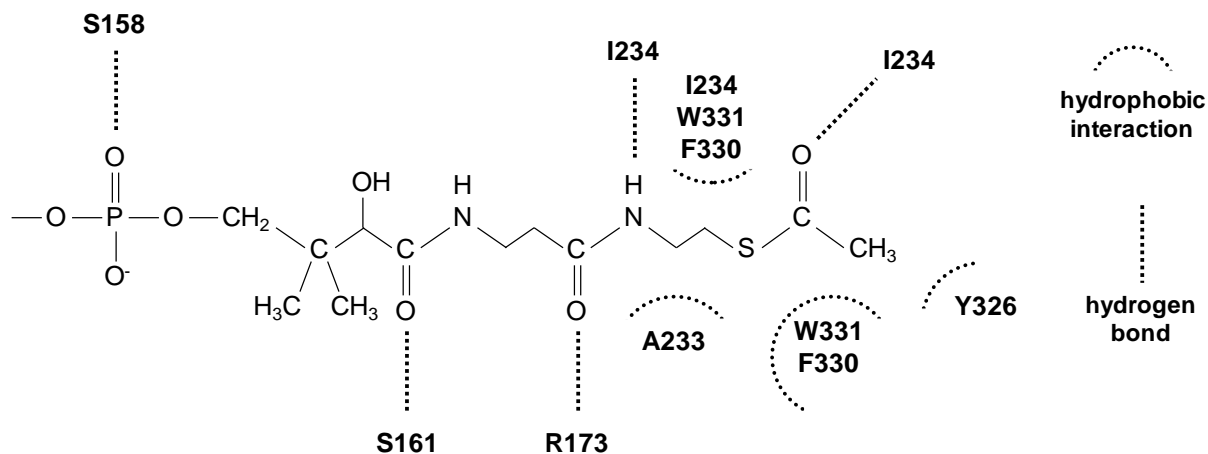

**Supplementary Figure S1:** Presumed binding of acetyl-CoA to the substrate binding site of yeast PanK (derived from the crystal structure of human PanK3 isoenzyme in the presence of acetyl-CoA; taken from Hong *et al.* [2007] and assigned to the yeast enzyme)



Cab1 (Sc) MPRITQEISYNCDYGDNTFNLAIDIGGTLAKVVFSPiHSNRLMFYTIETEKIDKFMELLH 60  
 CoaA (Sa) -----MKVGI**DAGGTLIKIVQE**--QDNQRTFKTELTKNIDQVVEWLN 40  
  
 Cab1 (Sc) SIIKEHNNGCYRMTHIIATGGGAFKFYDLLYENFPQIKGISRFEE**MEGLIHGLDFFIHEI** 120  
 CoaA (Sa) QQQ-----IEKLCLTGGNAGVIAENINIP-----AQIFVEFDAASQGLGILLKEQ 85  
  
 Cab1 (Sc) PDEVFTYNDQDGERIIP**TSSGT**MDSKAIYPYLLV**NI**SGV**SILK**VTEPN**NFSRV**GGSSLG 180  
 CoaA (Sa) G-----HDLADYIFANVGTG**TSLHY**FDGQ-SQRRVGGIGTG 120  
  
 Cab1 (Sc) GGT**LWGLLSLITGAQTYDQMLDWAQEGDNSSVDMLVGD**IYGT**DYNKIGLKSSA**TIASSFGK 240  
 CoaA (Sa) GGM**IQGLGYLLSQITDYKQLTDM**AQHGRNTIDLKVRHIY-KDTE-PP**IPGDLTAA**NFGH 178  
  
 Cab1 (Sc) VFQNRMTSNKSLENNENKLYSSHESIEK**NNGQMFKNPDICKSLLFAIS**NNIGQIAYLQAK 300  
 CoaA (Sa) VLHHL**DADFTPSN**-----KLA**AVIGV**VEVVT**TMAITVAR** 213  
  
 Cab1 (Sc) INNIQNIYFGGSYTRGHLTTMNTLS**YAIN**EW**SQ**SKQAFFLKHEGYLGAMGAFLSASRHS 360  
 CoaA (Sa) EFKTENIVYIGSS**FHNNALLR**KVVEDYTVLRG---CKPYYVENGAFSGAIGALYLEK\* 267  
  
 Cab1 (Sc) STKKTST\* 367

**Supplementary Figure S2:** Similarity of pantothenate kinases from *Saccharomyces cerevisiae* (Sc; *CAB1* gene product) and *Staphylococcus aureus* (Sa; *coaA* gene product). Conserved amino acids are shaded in grey. Amino acids used for mutational analysis of Cab1 are indicated in bold and by inverse shading.

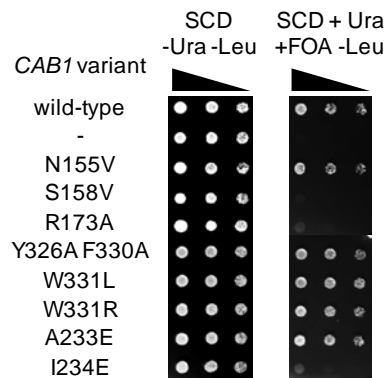

**Supplementary Figure S3:** Functional analysis of *CAB1* variants by plasmid shuffling. Strain JS19.1 with a chromosomal *cab1* $\Delta$  null allele and *ARS CEN URA3 CAB1* rescue plasmid (pJO57) was transformed with *ARS CEN LEU2* plasmids containing the *CAB1* variants indicated. All transformants were able to grow on double-selective synthetic medium (SCD-Ura-Leu) while only functional variants of *CAB1* allowed growth on FOA-containing medium after loss of the rescue plasmid. FOA: 5-Fluoroorotic acid.

## Supplementary description: Construction of pLEUTEX3

Plasmid pLEUTEX3 was constructed in a three-step-procedure:

### 1. Insertion of selection marker *LEU2* into pBluescript

Plasmid pJS491 (unpublished) had been constructed by inserting the selection marker *LEU2* flanked by loxP sites into the backbone of pUC19. Using pJS491 as a template together with PCR primers LEU2-LBN (introduces restriction sites for *Bam*HI and *Nsi*I) and LEU2-RXN (introduces restriction sites for *Xho*I and *Nhe*I), a 1.73 kb loxP::*LEU2*::loxP fragment was amplified, digested with *Bam*HI + *Xho*I and inserted into *Bam*HI + *Xho*I cleaved pBluescript II KS(+) to give pLEUTEX1.

### 2. Insertion of the HA<sub>3</sub> epitope and *CYC1* terminator

Using p425-MET25HA as a template together with PCR primers MET25HAX (introduces restriction site for *Xba*I) and *CYC1*TERNSI (introduces restriction site for *Nsi*I), a 0.4 kb fragment was amplified. This PCR fragment was digested with *Xba*I + *Nsi*I and inserted into pLEUTEX1 which had been also digested with these restriction enzymes (giving pLEUTEX2).

### 3. Insertion of *TPI1* promoter

The *TPI1* promoter was amplified using chromosomal DNA as a template together with PCR primers TPI1-Prom (introduces restriction sites for *Sac*I + *Bgl*II) and TPI1PR-XB (introduces restriction site for *Xba*I). The resulting 0.6 kb fragment was digested with *Sac*I + *Nsi*I and inserted into pLEUTEX2 which had been digested with the same restriction enzymes (to give pLEUTEX3).

Using pLEUTEX3, gene-specific expression cassettes can be constructed by inserting the coding region of a CoA biosynthetic gene (*TPI1-CAB* fusion) and ligating flanking sequences (about 400 bp; left flank: *Sac*I + *Bgl*II fragment, right flank: *Nhe*I + *Kpn*I fragment) on both sides. Following release of the expression cassette by cleavage with *Sac*I + *Kpn*I, recombination can occur at the chromosomal site homologous to the flanking region.

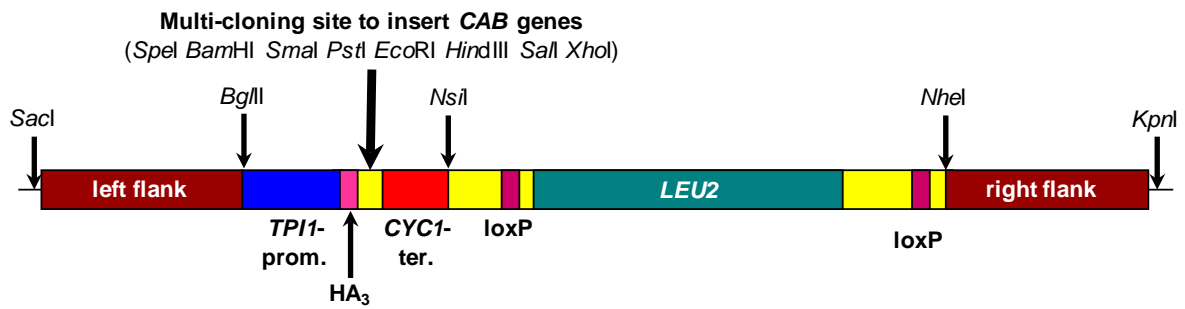

**Supplementary Figure S4:** Functional elements of pLEUTEX expression cassettes suitable for repeated integration of CoA biosynthetic genes. Selection marker *LEU2* flanked by loxP sites can be removed after a successful transformation by induction of cre recombinase which targets loxP sites. Several unique restriction sites following the *TPI1*-HA promoter/epitope segment allow insertion of *CAB* reading frame cassettes. For integration of the expression/selection cassette by homologous recombination, flanking sequences from a genomic site of choice must be inserted by using restriction sites *SacI* + *BglII* (left flank) and *NheI* + *KpnI* (right flank), respectively. Prior to yeast transformation, expression cassettes together with flanking regions can be released by cleavage with *SacI* + *KpnI*.

### Supplementary Method: Enzymatic assay of CoA + acetyl-CoA concentrations

The cycling assay described by Bergmeyer (1974) allows repeated use of CoA and acetyl-CoA by regeneration of CoA to acetyl-CoA catalyzed by phosphotransacetylase (PAT), leading to signal amplification. Using the citrate synthase (CS) reaction, acetyl-CoA and oxaloacetate react to give citrate. Oxaloacetate is synthesized from malate by NAD-dependent malate dehydrogenase which serves as a preceding indicator reaction, leading to an increase of absorbance by NADH at 340 nm.

NEM (N-ethylmaleimide) can react with free SH group of CoA so that only acetyl-CoA is detected.

Various samples containing CoA + acetyl-CoA with known concentrations (ratio 1:1) were used for calibration and validation of CoA assays in protein-free metabolite extracts. Dilution of these extracts as a result of protein removal was considered by calculation of the dilution factor.

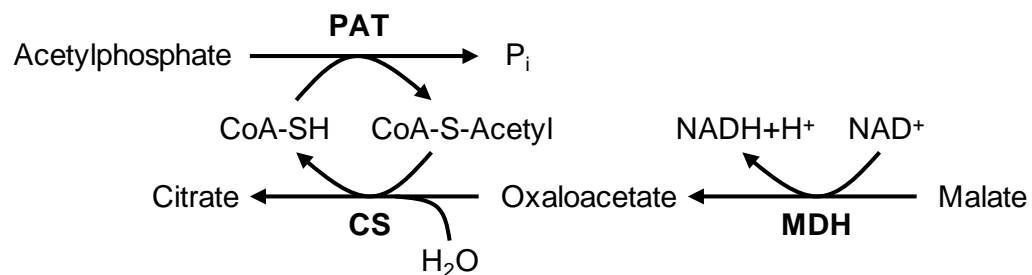

#### Reaction mixture (final concentrations):

- 140 mM Triethanolamine/HCl
- 10.5 mM Malate (potassium salt)
- 0.46 mM DTT or 0.46 mM NEM
- 1.4 mM NAD
- 4.6 mM Acetylphosphate (lithium salt)
- 7000 U/l PAT
- 1300 U/l CS
- 9800 U/l MDH
